# Supplementary material for: Wie fair testet der WÜRT 1 die Rechtschreibleistungen von mehrsprachigen Kindern?
Source: Atypon-hosted journal article supplement (doi:10.1026/0012-1924/a000319), 2023-05-10
Supplement: 0012-1924_a000319_esm1.pdf [file 0012-1924_a000319_esm1.pdf]

## ESM 1. Mplus-Syntax

Zur Überprüfung von DIF wurde der „*latent mixture modeling*“-Ansatz mit vordefinierten Klassen nach Raykov, Dimitrov, Marcoulides, Li und Menold (2018) gewählt.

### Syntax S1. Baselinemodell M0

#### !Legende:

**!t4wurtd1-t4wurtd8: WÜRT Diktat 4, Items 1 bis 8**

**!Lang2: Muttersprache des Kindes (0 = deutsch; 1 = mehrsprachig)**

**!WUERT1: latenter Faktor**

variable:

names = t4wurtd1 t4wurtd2 t4wurtd3 t4wurtd4 t4wurtd5 t4wurtd6 t4wurtd7 t4wurtd8 Lang2;

categorical = t4wurtd1 t4wurtd2 t4wurtd3 t4wurtd4 t4wurtd5 t4wurtd6 t4wurtd7 t4wurtd8;

knownclass = c(Lang2 = 0 Lang2 = 1);

classes = c(2);

analysis:

iterations = (300000);

estimator = MLR;

type = mixture;

algorithm = integration;

model:

%OVERALL%

!Faktorladungen über die Gruppen gleichgesetzt

WUERT1 by t4wurtd1\* (A)

t4wurtd2 (B)

t4wurtd3 (C)

t4wurtd4 (D)

t4wurtd5 (E)

t4wurtd6 (F)

t4wurtd7 (G)

t4wurtd8 (H);

!Thresholds über die Gruppen gleichgesetzt

[t4wurtd1\$1] (T1);

[t4wurtd2\$1] (T2);

[t4wurtd3\$1] (T3);

[t4wurtd4\$1] (T4);

[t4wurtd5\$1] (T5);

[t4wurtd6\$1] (T6);

[t4wurtd7\$1] (T7);

[t4wurtd8\$1] (T8);

!Mittelwert des latenten Faktors

[WUERT1@0];

!Varianz des latenten Faktors

## Testfairness des WÜRT 1 bei mehrsprachigen Kindern

WUERT1@1;

!Spezifizierungen für die mehrsprachige Gruppe

%C#2%

!Faktorladungen

WUERT1 by t4wurtd1\* (A)  
t4wurtd2 (B)  
t4wurtd3 (C)  
t4wurtd4 (D)  
t4wurtd5 (E)  
t4wurtd6 (F)  
t4wurtd7 (G)  
t4wurtd8 (H);

!Thresholds

[t4wurtd1\$1] (T1);  
[t4wurtd2\$1] (T2);  
[t4wurtd3\$1] (T3);  
[t4wurtd4\$1] (T4);  
[t4wurtd5\$1] (T5);  
[t4wurtd6\$1] (T6);  
[t4wurtd7\$1] (T7);  
[t4wurtd8\$1] (T8);

!Mittelwert des latenten Faktors der mehrsprachigen Gruppe

[WUERT1\*];

!Varianz des latenten Faktors der mehrsprachigen Gruppe

WUERT1\*;

### **Syntax S2.** Überprüfung der Faktorladungen

Um die Faktorladungen (hier: beispielhaft für das erste Item) auf Invarianz zu testen, werden in der Syntax des Baselinemodells M0 folgende Änderungen im Syntaxabschnitt %C#2% vorgenommen; der Rest bleibt unverändert. Die Prozedur wird anschließend sukzessiv für die restlichen Faktorladungen wiederholt.

WUERT1 by t4wurtd1\*  
t4wurtd2 (B)  
t4wurtd3 (C)  
t4wurtd4 (D)  
t4wurtd5 (E)  
t4wurtd6 (F)  
t4wurtd7 (G)  
t4wurtd8 (H);

### **Syntax S3.** Überprüfung der Thresholds

## Testfairness des WÜRT 1 bei mehrsprachigen Kindern

Um die Thresholds (hier: beispielhaft für das erste Item) auf Invarianz zu testen, werden in der Syntax des Baselinemodells M0 folgende Änderungen im Syntaxabschnitt %C#2% vorgenommen; der Rest bleibt unverändert. Die Prozedur wird anschließend sukzessiv für die restlichen Items wiederholt.

[t4wurtd1\$1\*];  
[t4wurtd2\$1] (T2);  
[t4wurtd3\$1] (T3);  
[t4wurtd4\$1] (T4);  
[t4wurtd5\$1] (T5);  
[t4wurtd6\$1] (T6);  
[t4wurtd7\$1] (T7);  
[t4wurtd8\$1] (T8);
