# Supplementary material for: Wie fair testet der WÜRT 1 die Rechtschreibleistungen von mehrsprachigen Kindern?
Source: Atypon-hosted journal article supplement (doi:10.1026/0012-1924/a000319), 2023-05-10
Supplement: 0012-1924_a000319_esm2.pdf [file 0012-1924_a000319_esm2.pdf]

**Tabelle E1.** Ergebnisse zum DIF für die Items aus dem WÜRT-Diktat #1 „Auf der Wiese“

| Modell   | Frei<br>gesetzter<br>Parameter | Log-<br>likelihood $\chi^2$ | SCF  | $\Delta\text{SB-}\chi^2$ | $p_{\Delta}$ | Rang | B-H Wert |
|----------|--------------------------------|-----------------------------|------|--------------------------|--------------|------|----------|
| Baseline | -                              | -1306.64                    | 1.03 | -                        | -            | -    | -        |
| W1(01)   | $\tau_{01}$                    | -1306.63                    | 1.03 | 0.019                    | .890         | 16   | .044     |
| W1(02)   | $\tau_{02}$                    | -1306.62                    | 1.02 | 0.050                    | .823         | 14   | .039     |
| W1(03)   | $\tau_{03}$                    | -1305.33                    | 1.03 | 2.578                    | .108         | 1    | .003     |
| W1(04)   | $\tau_{04}$                    | -1306.63                    | 1.02 | 0.027                    | .870         | 15   | .042     |
| W1(05)   | $\tau_{05}$                    | -1306.57                    | 1.02 | 0.152                    | .697         | 12   | .033     |
| W1(06)   | $\tau_{06}$                    | -1306.56                    | 1.03 | 0.163                    | .686         | 11   | .031     |
| W1(07)   | $\tau_{07}$                    | -1306.38                    | 1.02 | 0.539                    | .463         | 7    | .019     |
| W1(08)   | $\tau_{08}$                    | -1305.98                    | 1.02 | 1.594                    | .207         | 3    | .008     |
| W1(09)   | $\tau_{09}$                    | -1306.38                    | 1.03 | 0.500                    | .480         | 8    | .022     |
| W1(10)   | $\lambda_{01}$                 | -1305.98                    | 1.02 | 1.436                    | .231         | 5    | .014     |
| W1(11)   | $\lambda_{02}$                 | -1305.69                    | 1.02 | 2.037                    | .154         | 2    | .006     |
| W1(12)   | $\lambda_{03}$                 | -1306.33                    | 1.03 | 0.583                    | .445         | 6    | .017     |
| W1(13)   | $\lambda_{04}$                 | -1306.51                    | 1.02 | 0.272                    | .602         | 9    | .025     |
| W1(14)   | $\lambda_{05}$                 | -1305.85                    | 1.02 | 1.582                    | .209         | 4    | .011     |
| W1(15)   | $\lambda_{06}$                 | -1306.64                    | 1.02 | 0.001                    | .975         | 18   | .050     |
| W1(16)   | $\lambda_{07}$                 | -1306.64                    | 1.02 | 0.018                    | .893         | 17   | .047     |
| W1(17)   | $\lambda_{08}$                 | -1306.61                    | 1.03 | 0.066                    | .797         | 13   | .036     |
| W1(18)   | $\lambda_{09}$                 | -1306.54                    | 1.02 | 0.210                    | .647         | 10   | .028     |

*Anmerkungen.* DIF = Differential Item Functioning;  $\tau$  = Thresholds;  $\lambda$  = Faktorladungen; W1 = WÜRT Diktat #1 „Auf der Wiese“; SCF = Scaling Correction Factor;  $\Delta\text{SB-}\chi^2$  = robuster Santorra-Bentler  $\chi^2$  Wert für den jeweiligen Modellvergleich mit dem Baselinemodell auf Basis des log-likelihood Wertes und des SCF; Rang = Sortierung der  $p$ -Werte nach aufsteigender Höhe zur Berechnung der Benjamini-Hochberg-Methode; B-H-Wert = kritischer Wert der Benjamini-Hochberg-Methode.
