# Supplementary material for: Wie fair testet der WÜRT 1 die Rechtschreibleistungen von mehrsprachigen Kindern?
Source: Atypon-hosted journal article supplement (doi:10.1026/0012-1924/a000319), 2023-05-10
Supplement: 0012-1924_a000319_esm3.pdf [file 0012-1924_a000319_esm3.pdf]

**Tabelle E2.** Ergebnisse zum DIF für die Items aus dem WÜRT-Diktat #2 „Im Krankenhaus“

| Modell   | Frei gesetzter Parameter | Log-likelihood $\chi^2$ | SCF  | $\Delta\text{SB-}\chi^2$ | $p_{\Delta}$ | Rang | B-H Wert |
|----------|--------------------------|-------------------------|------|--------------------------|--------------|------|----------|
| Baseline | -                        | -1374.80                | 1.05 | -                        | -            | -    | -        |
| W2(01)   | $\tau_{01}$              | -1374.51                | 1.05 | 0.601                    | .438         | 11   | .031     |
| W2(02)   | $\tau_{02}$              | -1372.58                | 1.04 | 4.882                    | .027         | 1    | .003     |
| W2(03)   | $\tau_{03}$              | -1374.14                | 1.04 | 1.451                    | .228         | 5    | .014     |
| W2(04)   | $\tau_{05}$              | -1374.72                | 1.04 | 0.148                    | .701         | 16   | .044     |
| W2(05)   | $\tau_{06}$              | -1373.49                | 1.05 | 2.615                    | .106         | 2    | .006     |
| W2(06)   | $\tau_{07}$              | -1374.73                | 1.05 | 0.120                    | .729         | 17   | .047     |
| W2(07)   | $\tau_{08}$              | -1374.31                | 1.05 | 0.923                    | .337         | 10   | .028     |
| W2(08)   | $\tau_{09}$              | -1373.64                | 1.05 | 2.364                    | .124         | 3    | .008     |
| W2(09)   | $\tau_{10}$              | -1374.54                | 1.04 | 0.532                    | .466         | 12   | .033     |
| W2(10)   | $\lambda_{01}$           | -1374.36                | 1.04 | 0.929                    | .335         | 9    | .025     |
| W2(11)   | $\lambda_{02}$           | -1374.76                | 1.05 | 0.056                    | .813         | 18   | .050     |
| W2(12)   | $\lambda_{03}$           | -1374.52                | 1.05 | 0.555                    | .456         | 13   | .036     |
| W2(13)   | $\lambda_{05}$           | -1374.65                | 1.04 | 0.319                    | .572         | 14   | .039     |
| W2(14)   | $\lambda_{06}$           | -1374.26                | 1.05 | 1.035                    | .308         | 8    | .022     |
| W2(15)   | $\lambda_{07}$           | -1373.86                | 1.05 | 1.727                    | .189         | 4    | .011     |
| W2(16)   | $\lambda_{08}$           | -1374.06                | 1.05 | 1.401                    | .237         | 6    | .017     |
| W2(17)   | $\lambda_{09}$           | -1374.10                | 1.06 | 1.109                    | .292         | 7    | .019     |
| W2(18)   | $\lambda_{10}$           | -1374.69                | 1.05 | 0.203                    | .652         | 15   | .042     |

*Anmerkungen.* DIF = Differential Item Functioning;  $\tau$  = Thresholds;  $\lambda$  = Faktorladungen; W2 = WÜRT Diktat #2 „Im Krankenhaus“; SCF = Scaling Correction Factor;  $\Delta\text{SB-}\chi^2$  = robuster Santorra-Bentler  $\chi^2$  Wert für den jeweiligen Modellvergleich mit dem Baselinemodell auf Basis des log-likelihood Wertes und des SCF; Rang = Sortierung der  $p$ -Werte nach aufsteigender Höhe zur Berechnung der Benjamini-Hochberg-Methode; B-H-Wert = kritischer Wert der Benjamini-Hochberg-Methode. Bei der DIF-Analyse wurde Item 4 (d.h. das Wort „Rücken“) wegen seiner nicht signifikanten Faktorladung in den gruppenspezifischen Baseline-Modellen ausgeschlossen.
