# Supplementary material for: Wie fair testet der WÜRT 1 die Rechtschreibleistungen von mehrsprachigen Kindern?
Source: Atypon-hosted journal article supplement (doi:10.1026/0012-1924/a000319), 2023-05-10
Supplement: 0012-1924_a000319_esm4.pdf [file 0012-1924_a000319_esm4.pdf]

**Tabelle E3.** Ergebnisse zum DIF für die Items aus dem WÜRT-Diktat #3 „Im Park“

| Modell   | Frei gesetzter Parameter | Log-likelihood $\chi^2$ | SCF  | $\Delta\text{SB-}\chi^2$ | $p_{\Delta}$ | Rang | B-H Wert |
|----------|--------------------------|-------------------------|------|--------------------------|--------------|------|----------|
| Baseline | -                        | -1433.79                | 1.01 | -                        | -            | -    | -        |
| W3(01)   | $\tau_{01}$              | -1433.60                | 1.01 | 0.403                    | .526         | 10   | .028     |
| W3(02)   | $\tau_{02}$              | -1433.64                | 1.01 | 0.327                    | .567         | 12   | .033     |
| W3(03)   | $\tau_{03}$              | -1433.77                | 1.01 | 0.035                    | .852         | 16   | .044     |
| W3(04)   | $\tau_{04}$              | -1433.25                | 1.01 | 1.067                    | .302         | 7    | .019     |
| W3(05)   | $\tau_{05}$              | -1432.87                | 1.01 | 1.880                    | .170         | 3    | .008     |
| W3(06)   | $\tau_{06}$              | -1433.62                | 1.01 | 0.363                    | .547         | 11   | .031     |
| W3(07)   | $\tau_{07}$              | -1432.16                | 1.01 | 3.488                    | .062         | 2    | .006     |
| W3(08)   | $\tau_{08}$              | -1428.27                | 1.01 | 11.508                   | <.001        | 1    | .003     |
| W3(09)   | $\tau_{09}$              | -1433.18                | 1.01 | 1.370                    | .242         | 4    | .011     |
| W3(10)   | $\lambda_{01}$           | -1433.35                | 1.01 | 0.896                    | .344         | 8    | .022     |
| W3(11)   | $\lambda_{02}$           | -1433.69                | 1.01 | 0.215                    | .643         | 13   | .036     |
| W3(12)   | $\lambda_{03}$           | -1433.27                | 1.01 | 1.081                    | .299         | 6    | .017     |
| W3(13)   | $\lambda_{04}$           | -1433.79                | 1.01 | 0.009                    | .924         | 17   | .047     |
| W3(14)   | $\lambda_{05}$           | -1433.75                | 1.01 | 0.086                    | .769         | 15   | .042     |
| W3(15)   | $\lambda_{06}$           | -1433.74                | 1.00 | 0.142                    | .706         | 14   | .039     |
| W3(16)   | $\lambda_{07}$           | -1433.03                | 1.02 | 1.309                    | .253         | 5    | .014     |
| W3(17)   | $\lambda_{08}$           | -1433.11                | 1.04 | 0.841                    | .359         | 9    | .025     |
| W3(18)   | $\lambda_{09}$           | -1433.79                | 1.01 | 0.008                    | .929         | 18   | .050     |

*Anmerkungen.* DIF = Differential Item Functioning;  $\tau$  = Thresholds;  $\lambda$  = Faktorladungen; W3 = WÜRT Diktat #3 „Im Park“; SCF = Scaling Correction Factor;  $\Delta\text{SB-}\chi^2$  = robuster Santorra-Bentler  $\chi^2$  Wert für den jeweiligen Modellvergleich mit dem Baselinemodell auf Basis des log-likelihood Wertes und des SCF; Rang = Sortierung der  $p$ -Werte nach aufsteigender Höhe zur Berechnung der Benjamini-Hochberg-Methode; B-H-Wert = kritischer Wert der Benjamini-Hochberg-Methode.
