# Supplementary material for: Wie fair testet der WÜRT 1 die Rechtschreibleistungen von mehrsprachigen Kindern?
Source: Atypon-hosted journal article supplement (doi:10.1026/0012-1924/a000319), 2023-05-10
Supplement: 0012-1924_a000319_esm5.pdf [file 0012-1924_a000319_esm5.pdf]

**Tabelle E4.** Ergebnisse zum DIF für die Items aus dem WÜRT-Diktat #4 „Im Freien“

| Modell   | Frei<br>gesetzter<br>Parameter | Log-<br>likelihood $\chi^2$ | SCF  | $\Delta\text{SB-}\chi^2$ | $p_{\Delta}$ | Rang | B-H Wert |
|----------|--------------------------------|-----------------------------|------|--------------------------|--------------|------|----------|
| Baseline | -                              | -1179.19                    | 0.99 | -                        | -            | -    | -        |
| W4(01)   | $\tau_{01}$                    | -1179.19                    | 0.98 | 0.002                    | .964         | 16   | .050     |
| W4(02)   | $\tau_{02}$                    | -1179.18                    | 0.99 | 0.012                    | .913         | 14   | .044     |
| W4(03)   | $\tau_{03}$                    | -1178.99                    | 0.99 | 0.369                    | .544         | 4    | .013     |
| W4(04)   | $\tau_{04}$                    | -1176.05                    | 0.98 | 6.763                    | .009         | 1    | .003     |
| W4(05)   | $\tau_{05}$                    | -1179.18                    | 0.99 | 0.012                    | .913         | 14   | .044     |
| W4(06)   | $\tau_{06}$                    | -1179.10                    | 0.99 | 0.169                    | .681         | 8    | .025     |
| W4(07)   | $\tau_{07}$                    | -1178.86                    | 0.99 | 0.664                    | .664         | 7    | .022     |
| W4(08)   | $\tau_{08}$                    | -1178.52                    | 0.99 | 1.345                    | .246         | 2    | .006     |
| W4(09)   | $\lambda_{01}$                 | -1179.13                    | 0.98 | 0.141                    | .707         | 9    | .028     |
| W4(10)   | $\lambda_{02}$                 | -1179.00                    | 0.99 | 0.342                    | .559         | 5    | .016     |
| W4(11)   | $\lambda_{03}$                 | -1179.13                    | 0.99 | 0.120                    | .729         | 10   | .031     |
| W4(12)   | $\lambda_{04}$                 | -1179.15                    | 1.00 | 0.069                    | .793         | 12   | .038     |
| W4(13)   | $\lambda_{05}$                 | -1179.07                    | 0.99 | 0.223                    | .637         | 6    | .019     |
| W4(14)   | $\lambda_{06}$                 | -1178.85                    | 1.00 | 0.574                    | .449         | 3    | .009     |
| W4(15)   | $\lambda_{07}$                 | -1179.19                    | 1.00 | 0.008                    | .929         | 15   | .047     |
| W4(16)   | $\lambda_{08}$                 | -1179.14                    | 1.00 | 0.119                    | .730         | 11   | .034     |

*Anmerkungen.* DIF = Differential Item Functioning;  $\tau$  = Thresholds;  $\lambda$  = Faktorladungen; W4 = WÜRT Diktat #4 „Im Freien“; SCF = Scaling Correction Factor;  $\Delta\text{SB-}\chi^2$  = robuster Santorra-Bentler  $\chi^2$  Wert für den jeweiligen Modellvergleich mit dem Baselinemodell auf Basis des log-likelihood Wertes und des SCF; Rang = Sortierung der  $p$ -Werte nach aufsteigender Höhe zur Berechnung der Benjamini-Hochberg-Methode; B-H-Wert = kritischer Wert der Benjamini-Hochberg-Methode.
