# Supplementary material for: Wie fair testet der WÜRT 1 die Rechtschreibleistungen von mehrsprachigen Kindern?
Source: Atypon-hosted journal article supplement (doi:10.1026/0012-1924/a000319), 2023-05-10
Supplement: 0012-1924_a000319_esm6.pdf [file 0012-1924_a000319_esm6.pdf]

**Tabelle E5.** Post-hoc Vergleiche für die Fehlerkategorien im Rahmen der Messwiederholungs-ANOVA im Zwei-Gruppen-Fall

| Paarweiser Vergleich der Fehlerkategorien |    | Mittlere Differenz | Standardfehler | <i>p</i> |
|-------------------------------------------|----|--------------------|----------------|----------|
| A                                         | H  | 7.49               | 0.42           | < .0001  |
|                                           | LV | 2.15               | 0.39           | < .0001  |
|                                           | U  | 7.96               | 0.43           | < .0001  |
|                                           | SW | 8.02               | 0.40           | < .0001  |
|                                           | GK | -9.76              | 0.61           | < .0001  |
|                                           | LF | -3.06              | 0.40           | < .0001  |
|                                           | AW | 8.11               | 0.43           | < .0001  |
| H                                         | LV | -5.34              | 0.30           | < .0001  |
|                                           | U  | 0.47               | 0.12           | .004     |
|                                           | SW | 0.53               | 0.18           | .121     |
|                                           | GK | -17.25             | 0.42           | <.0001   |
|                                           | LF | -10.55             | 0.28           | <.0001   |
|                                           | AW | 0.62               | 0.15           | .002     |
| LV                                        | U  | 5.81               | 0.31           | <.0001   |
|                                           | SW | 5.87               | 0.32           | <.0001   |
|                                           | GK | -11.91             | 0.50           | <.0001   |
|                                           | LF | -5.21              | 0.30           | <.0001   |
|                                           | AW | 5.96               | 0.32           | <.0001   |
| U                                         | SW | 0.06               | 0.18           | 1.00     |
|                                           | GK | -17.72             | 0.43           | <.0001   |
|                                           | LF | -11.02             | 0.28           | <.0001   |
|                                           | AW | 0.15               | 0.15           | 1.00     |
| SW                                        | GK | -17.78             | 0.48           | <.0001   |
|                                           | LF | -11.08             | 0.33           | <.0001   |
|                                           | AW | 0.09               | 0.18           | 1.00     |
| GK                                        | LF | 6.70               | 0.46           | <.0001   |
|                                           | AW | 17.87              | 0.46           | <.0001   |
| LF                                        | AW | 11.17              | 0.30           | <.0001   |

*Anmerkungen.* Unter Berücksichtigung der Bonferroni-Korrektur sind p-Werte < .0018 statistisch signifikant.
