# Supplementary material for: Wie fair testet der WÜRT 1 die Rechtschreibleistungen von mehrsprachigen Kindern?
Source: Atypon-hosted journal article supplement (doi:10.1026/0012-1924/a000319), 2023-05-10
Supplement: 0012-1924_a000319_esm7.pdf [file 0012-1924_a000319_esm7.pdf]

**Tabelle E6.** Post-hoc Vergleiche für die Fehlerkategorien im Rahmen der Messwiederholungs-ANOVA im Drei-Gruppen-Fall

| Paarweiser Vergleich der Fehlerkategorien |    | Mittlere Differenz | Standardfehler | <i>p</i> |
|-------------------------------------------|----|--------------------|----------------|----------|
| A                                         | H  | 7.72               | 0.47           | < .0001  |
|                                           | LV | 2.31               | 0.43           | < .0001  |
|                                           | U  | 8.21               | 0.47           | < .0001  |
|                                           | SW | 8.34               | 0.44           | < .0001  |
|                                           | GK | -9.57              | 0.67           | < .0001  |
|                                           | LF | -2.85              | 0.45           | < .0001  |
|                                           | AW | 8.47               | 0.48           | < .0001  |
| H                                         | LV | -5.41              | 0.33           | < .0001  |
|                                           | U  | 0.48               | 0.13           | .011     |
|                                           | SW | 0.61               | 0.20           | .079     |
|                                           | GK | -17.29             | 0.46           | <.0001   |
|                                           | LF | -10.58             | 0.31           | <.0001   |
|                                           | AW | 0.75               | 0.17           | .0005    |
|                                           | U  | 5.99               | 0.34           | <.0001   |
| LV                                        | SW | 6.03               | 0.36           | <.0001   |
|                                           | GK | -11.88             | 0.55           | <.0001   |
|                                           | LF | -5.16              | 0.33           | <.0001   |
|                                           | AW | 6.16               | 0.35           | <.0001   |
|                                           | U  | 0.13               | 0.20           | 1.00     |
| U                                         | GK | -17.78             | 0.47           | <.0001   |
|                                           | LF | -11.06             | 0.31           | <.0001   |
|                                           | AW | 0.26               | 0.17           | 1.00     |
|                                           | SW | -17.90             | 0.53           | <.0001   |
| SW                                        | LF | -11.19             | 0.37           | <.0001   |
|                                           | AW | 0.14               | 0.20           | 1.00     |
|                                           | GK | 6.71               | 0.51           | <.0001   |
| GK                                        | AW | 18.04              | 0.51           | <.0001   |
|                                           | LF | 11.32              | 0.34           | <.0001   |

*Anmerkungen.* Unter Berücksichtigung der Bonferroni-Korrektur sind p-Werte < .0018 statistisch signifikant.
